# Supplementary material for: Cholesterol appended pyridinium ureas: a case of gel making and breaking for selective visual readout of F−
Source: Royal Society of Chemistry journal article supplement (doi:10.1039/c2ob26631h), 2012-01-01
Supplement: c2ob26631h.pdf [file c2ob26631h.pdf]

## Cholesterol appended pyridinium ureas: A case of gel making and breaking for selective visual readout of F<sup>-</sup>

Kumares Ghosh\*, Debasis Kar

Department of Chemistry, University of Kalyani, Kalyani, Nadia-741235, India,

Email: ghosh\_k2003@yahoo.co.in, Fax: +91 33258282

1. Change in emission of receptor **1** with HSO<sub>4</sub><sup>-</sup>, Cl<sup>-</sup>, Br<sup>-</sup>, I<sup>-</sup>, ClO<sub>4</sub><sup>-</sup>, AcO<sup>-</sup>, H<sub>2</sub>PO<sub>4</sub><sup>-</sup> in CH<sub>3</sub>CN.
2. Change in of absorbance receptor **1** with HSO<sub>4</sub><sup>-</sup>, Cl<sup>-</sup>, Br<sup>-</sup>, I<sup>-</sup>, ClO<sub>4</sub><sup>-</sup>, AcO<sup>-</sup>, H<sub>2</sub>PO<sub>4</sub><sup>-</sup> in CH<sub>3</sub>CN.
3. Change of emission spectra of receptor **1** upon addition of 2 equivalent of different anions in CH<sub>3</sub>CN.
4. Change in emission of receptor **1** with HSO<sub>4</sub><sup>-</sup>, Cl<sup>-</sup>, Br<sup>-</sup>, I<sup>-</sup>, ClO<sub>4</sub><sup>-</sup>, AcO<sup>-</sup>, H<sub>2</sub>PO<sub>4</sub><sup>-</sup> in DMSO.
5. Change in absorbance of receptor **1** with HSO<sub>4</sub><sup>-</sup>, Cl<sup>-</sup>, Br<sup>-</sup>, I<sup>-</sup>, ClO<sub>4</sub><sup>-</sup>, AcO<sup>-</sup>, H<sub>2</sub>PO<sub>4</sub><sup>-</sup> in DMSO.
6. Change of emission spectra of receptor **1** upon addition of 15 equivalent of different anion in DMSO.
7. Benesi–Hilderband plot for **1** with fluoride in CH<sub>3</sub>CN.
8. Benesi–Hilderband plot for **1** with F<sup>-</sup> in DMSO.
9. Photograph of formation of gel for receptor **1** with 5 equiv. amounts of Fluoride in DMSO.
10. Job Plot of **1** with TBAF in DMSO.
11. Comparision of IR Septra.
12. Characterization spectra
13. Comparative <sup>1</sup>H NMR and FTIR spectra
14. UV-vis titration spectra for 2 with the anions.

### 1. Change in emission of receptor **1** with various anions in CH<sub>3</sub>CN.

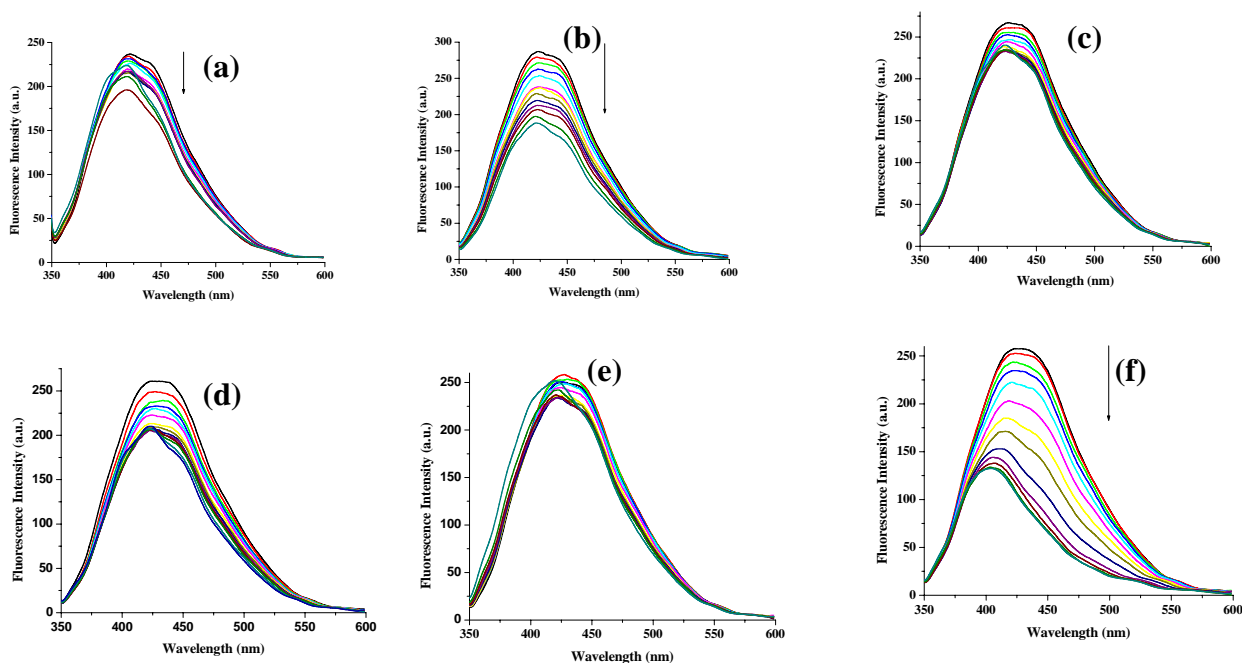

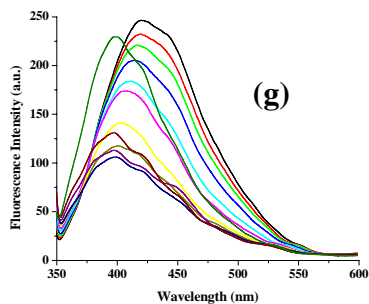

**Figure 1S.** Fluorescence titration spectra for **1** ( $c = 6.32 \times 10^{-5}$  M) with (a) HSO<sub>4</sub><sup>-</sup>, (b) Cl<sup>-</sup>, (c) Br<sup>-</sup>, (d) I<sup>-</sup>, (e) ClO<sub>4</sub><sup>-</sup>, (f) AcO<sup>-</sup> (g) H<sub>2</sub>PO<sub>4</sub><sup>-</sup> in CH<sub>3</sub>CN (in all cases [anion] = 1 x 10<sup>-3</sup> M).

## 2. Change in absorbance of receptor 1 with various anions in CH<sub>3</sub>CN.

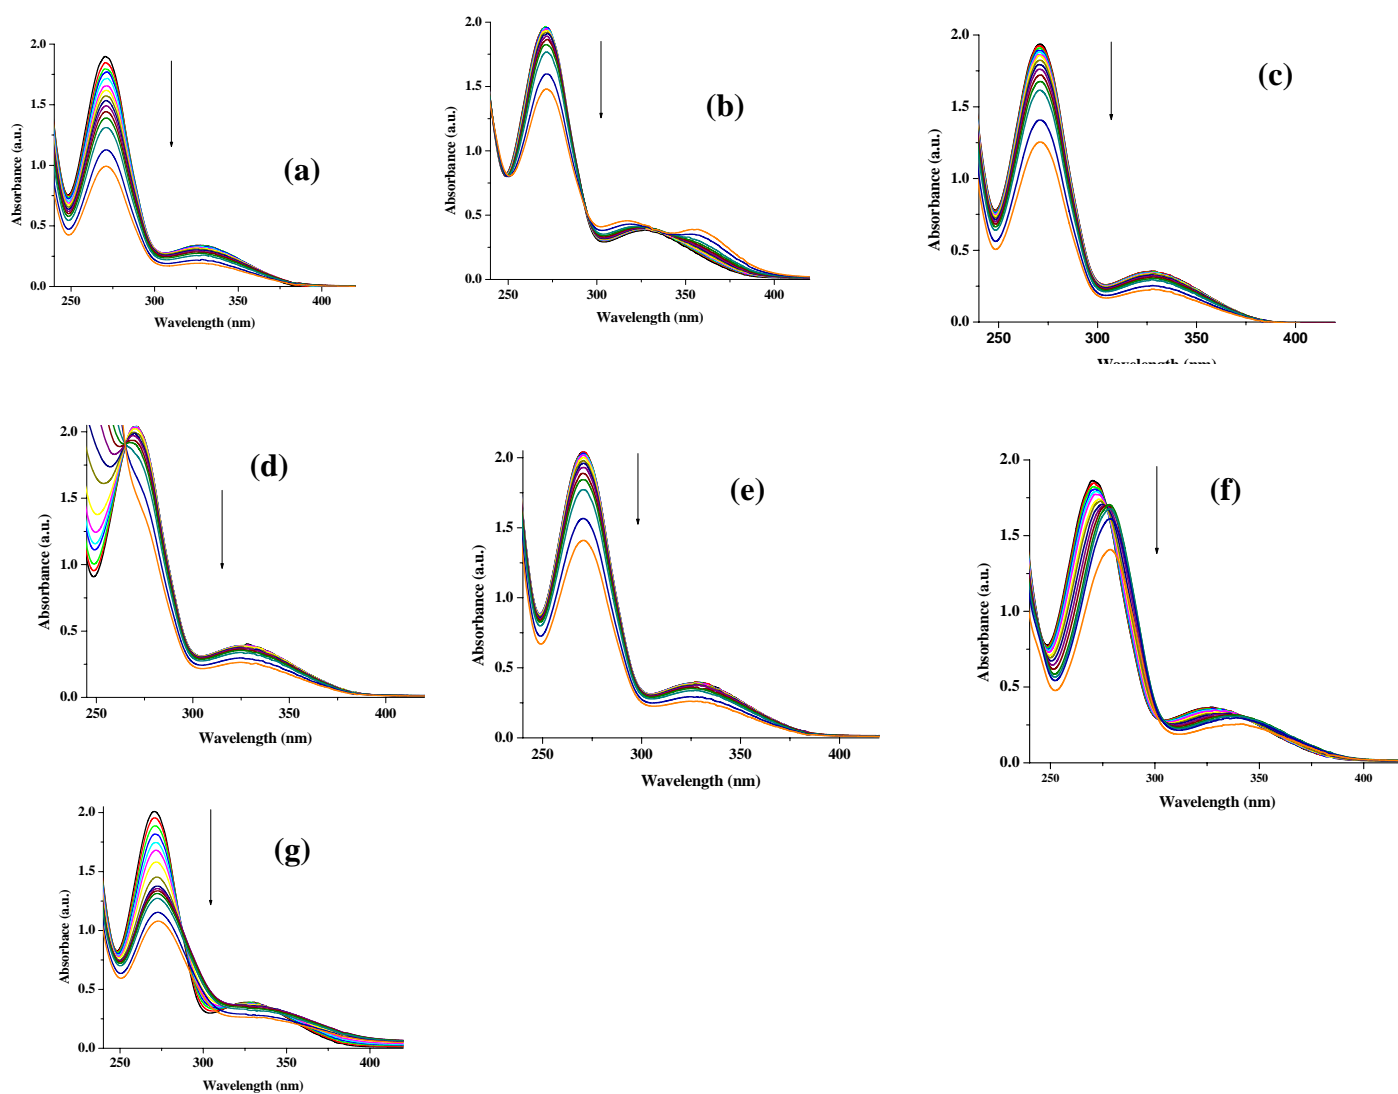

**Figure 2S.** Change in absorbance of receptor **1** ( $c = 6.32 \times 10^{-5}$  M) with (a) HSO<sub>4</sub><sup>-</sup>, (b) Cl<sup>-</sup>, (c) Br<sup>-</sup>, (d) I<sup>-</sup>, (e) ClO<sub>4</sub><sup>-</sup> (f) AcO<sup>-</sup> (g) H<sub>2</sub>PO<sub>4</sub><sup>-</sup> in CH<sub>3</sub>CN (in all cases [anion] = 1 x 10<sup>-3</sup> M).

### 3. Change of emission spectra of receptor 1 upon addition of 2 equivalent of different anion in CH<sub>3</sub>CN.

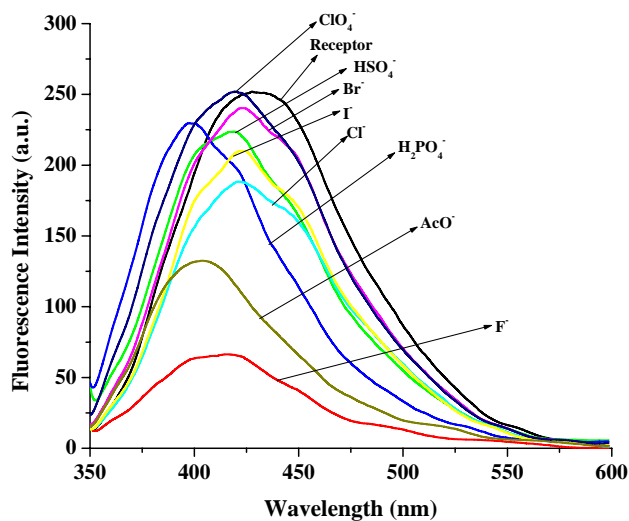

**Figure 3S:** Change in emission of receptor 1 ( $c = 6.32 \times 10^{-5}$  M) upon addition of 2 eqv. of different Guests ( $c = 1 \times 10^{-3}$  M) in CH<sub>3</sub>CN.

### 4. Change in emission of receptor 1 with various anions in DMSO.

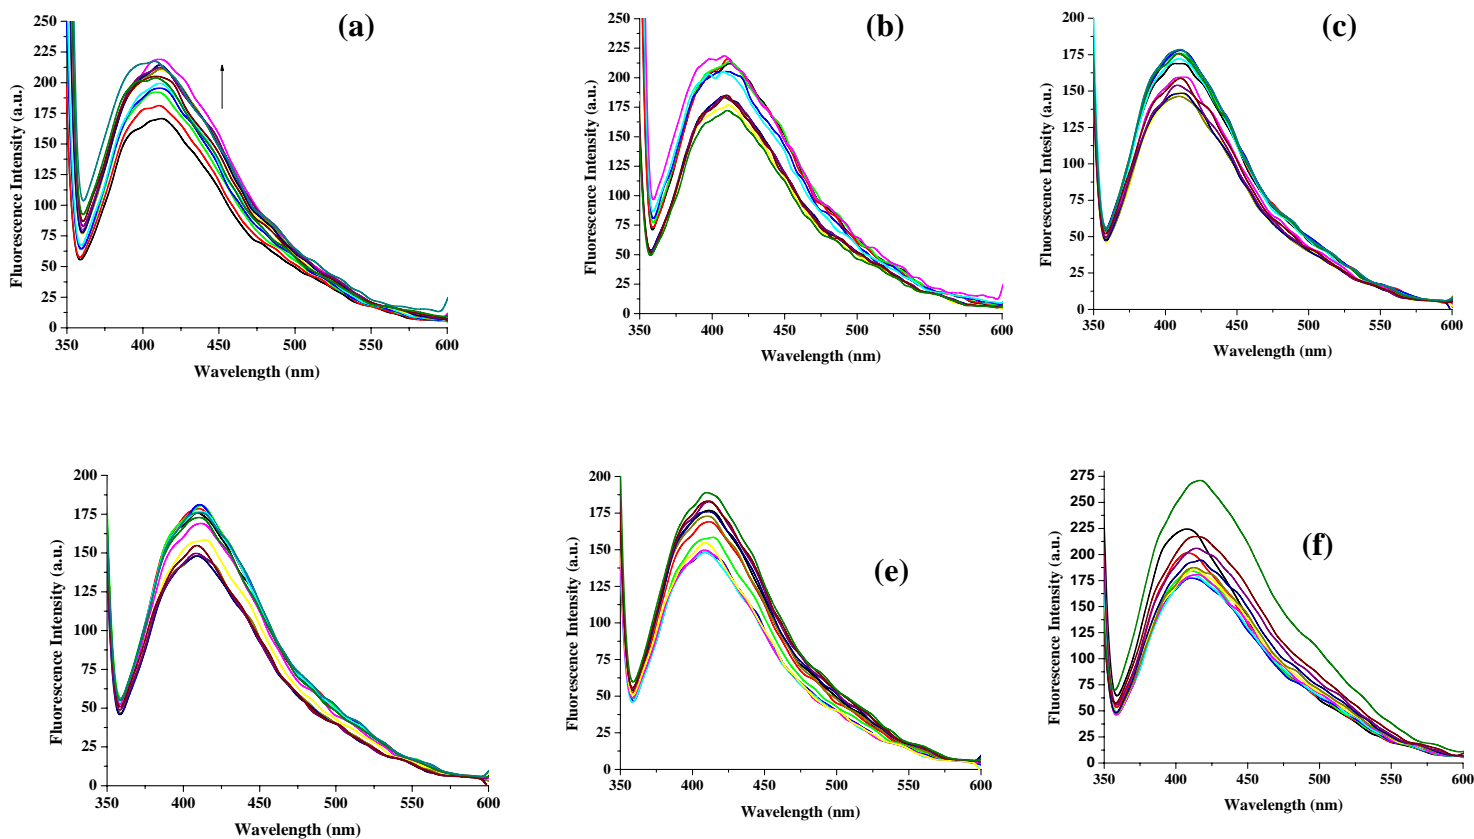

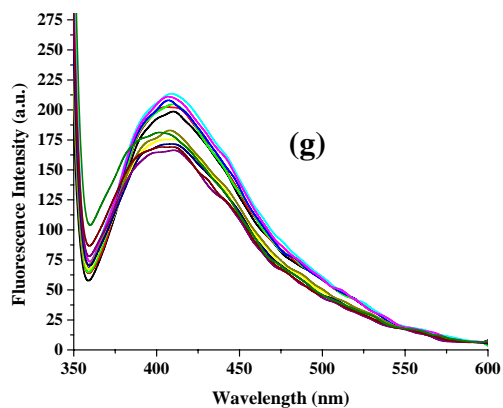

**Figure 4S.** Fluorescence titration spectra for **1** (c = 6.01 x 10<sup>-5</sup> M) with (a) HSO<sub>4</sub><sup>-</sup>, (b) Cl<sup>-</sup>, (c) Br<sup>-</sup>, (d) I<sup>-</sup>, (e) ClO<sub>4</sub><sup>-</sup>, (f) AcO<sup>-</sup> (g) H<sub>2</sub>P<sub>2</sub>O<sub>7</sub><sup>4-</sup> in DMSO (in all cases [anion] = 1 x 10<sup>-3</sup> M)

### 5. Change in absorbance of receptor 1 with various anions in DMSO.

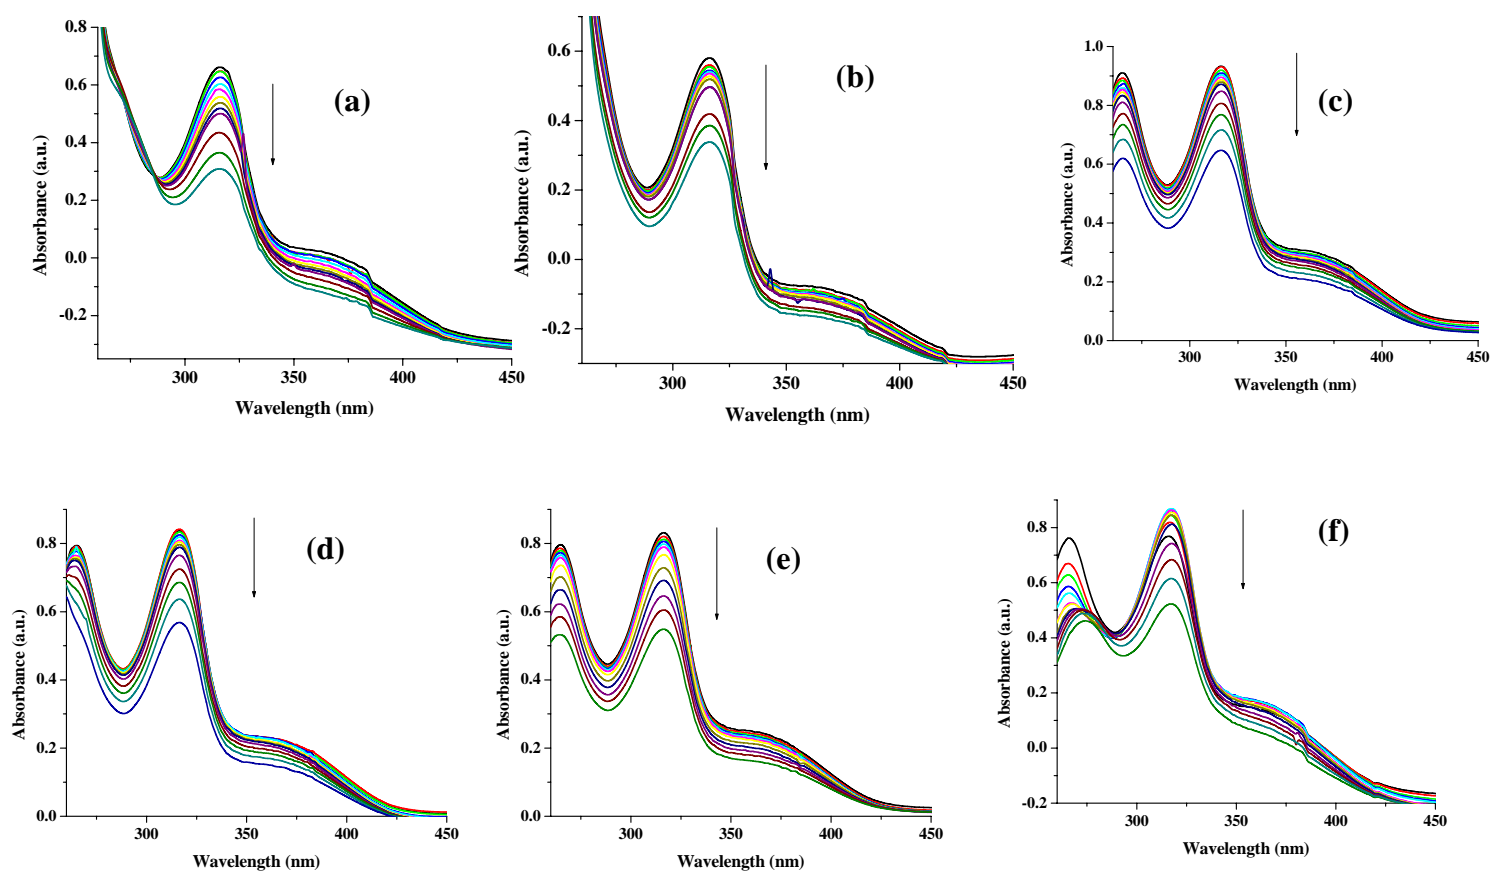

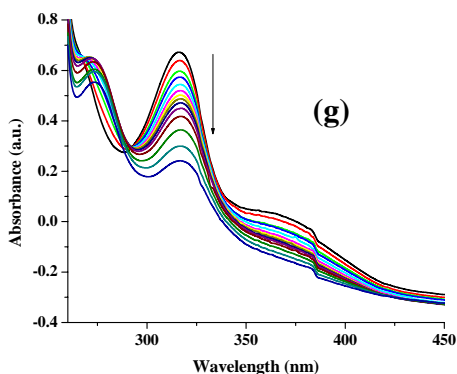

**Figure 5S.** Change in absorbance of receptor **1** ( $c = 6.01 \times 10^{-5}$  M) with (a)  $\text{HSO}_4^-$ , (b)  $\text{Cl}^-$ , (c)  $\text{Br}^-$ , (d)  $\text{I}^-$ , (e)  $\text{ClO}_4^-$  (f)  $\text{AcO}^-$  (g)  $\text{H}_2\text{PO}_4^-$  in DMSO (in all cases  $[\text{anion}] = 1 \times 10^{-3}$  M).

## 6. Change of emission spectra of receptor 1 upon addition of 15 equivalent of different anion in DMSO.

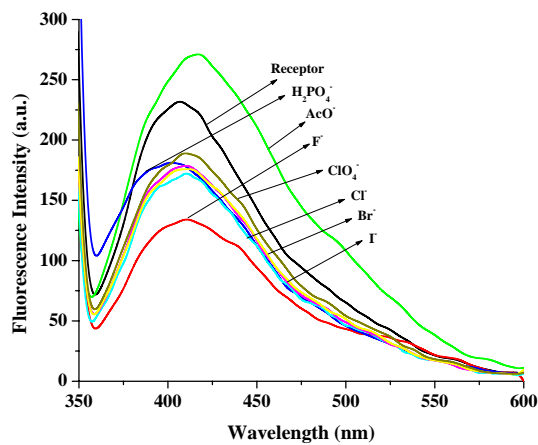

**Figure 6S:** Change in emission of receptor **1** ( $c = 6.01 \times 10^{-5}$  M) upon addition of 15 eqv. of Different Guest ( $c = 1 \times 10^{-3}$  M) in DMSO

### 7. Benesi–Hilderband plot for **1** with F<sup>-</sup> in CH<sub>3</sub>CN.

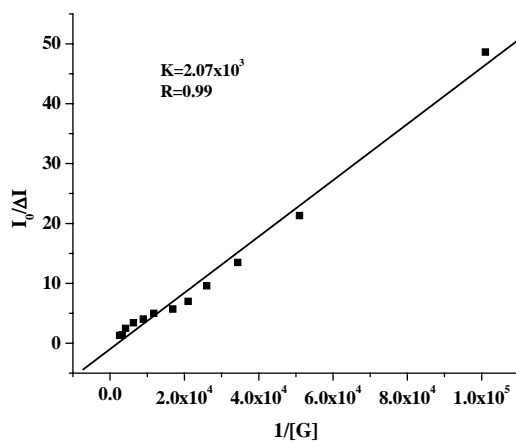

**Figure 7S:** Benesi–Hilderband plot for receptor **1** ( $c = 6.32 \times 10^{-5}$  M) with fluoride ( $c = 1 \times 10^{-3}$  M) at 430 nm in CH<sub>3</sub>CN

### 8. Benesi–Hilderband plot for **1** with F<sup>-</sup> in DMSO.

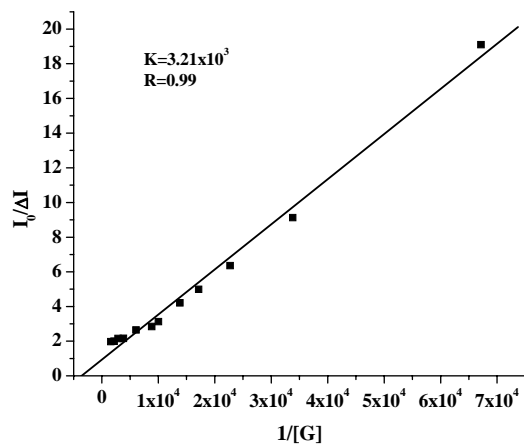

**Figure 8S:** Benesi–Hilderband plot for receptor **1** ( $c = 6.01 \times 10^{-5}$  M) with fluoride ( $c = 1 \times 10^{-3}$  M) at 410 nm in DMSO.

### 9. Photograph of formation of gel for receptor 1 with 5 equiv. amounts of Fluoride in DMSO.

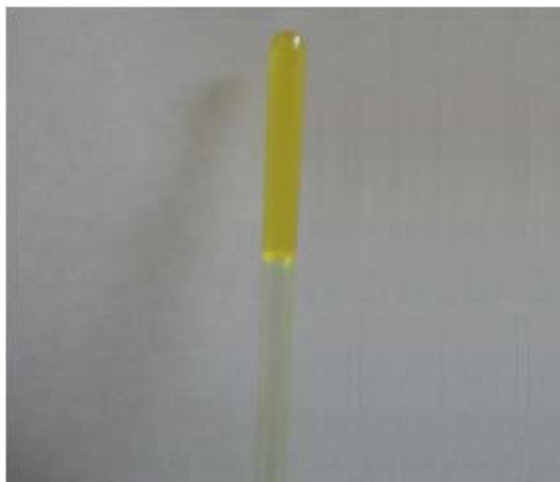

Fig 9S. Photograph of Receptor 1 ( $c = 3.58 \times 10^{-3}$  M) with 5 equiv. amounts of Fluoride ( $c = 1.5 \times 10^{-2}$  M) in DMSO.

### 10. Job plot of 1 with $F^-$ in DMSO.

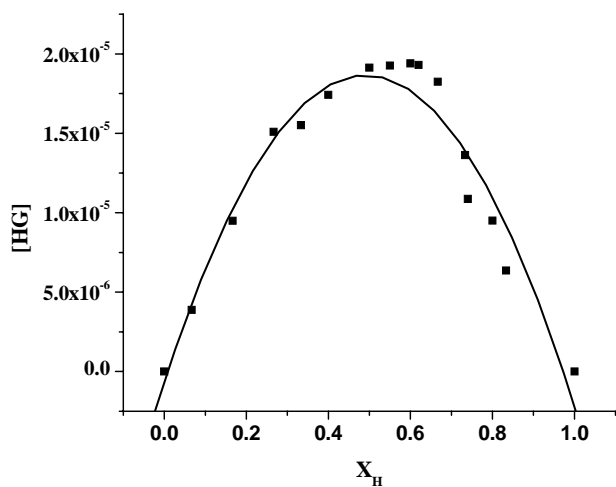

Fig 10S. Job plot for 1 ( $c = 5.96 \times 10^{-5}$  M) with TBAF in DMSO.

## 11. Comparison of IR- Spectra.

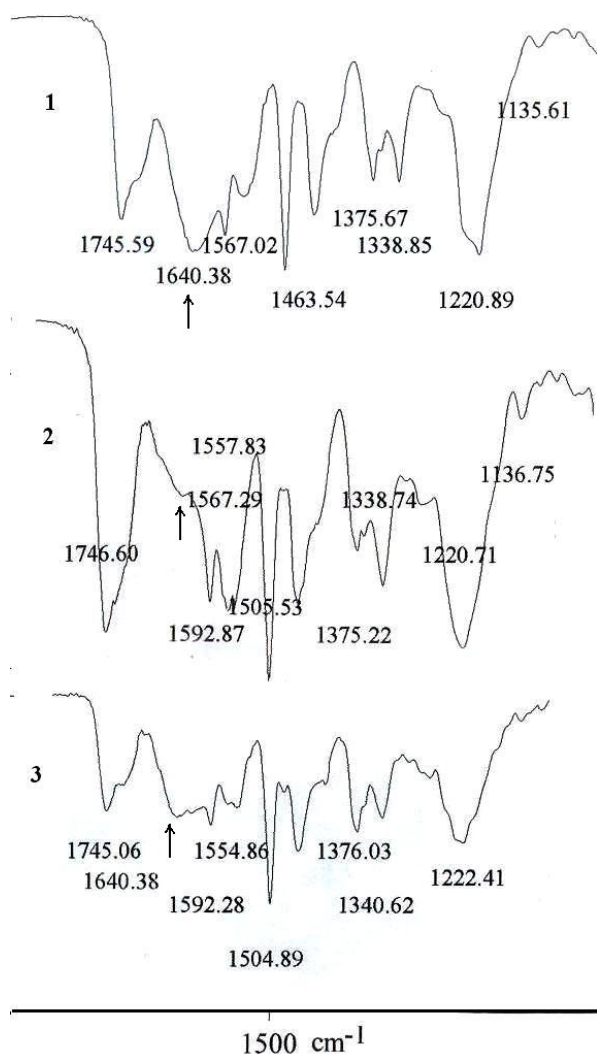

**Fig 11S.** 1 Partial IR spectrum of **2a**. 2 partial IR spectrum of **2a** in gel state. 3 Partial IR spectrum of **2a** after breaking the gel with fluoride.



## 12. Characterization spectra

### <sup>1</sup>H NMR (400 MHz, d<sub>6</sub>-DMSO)

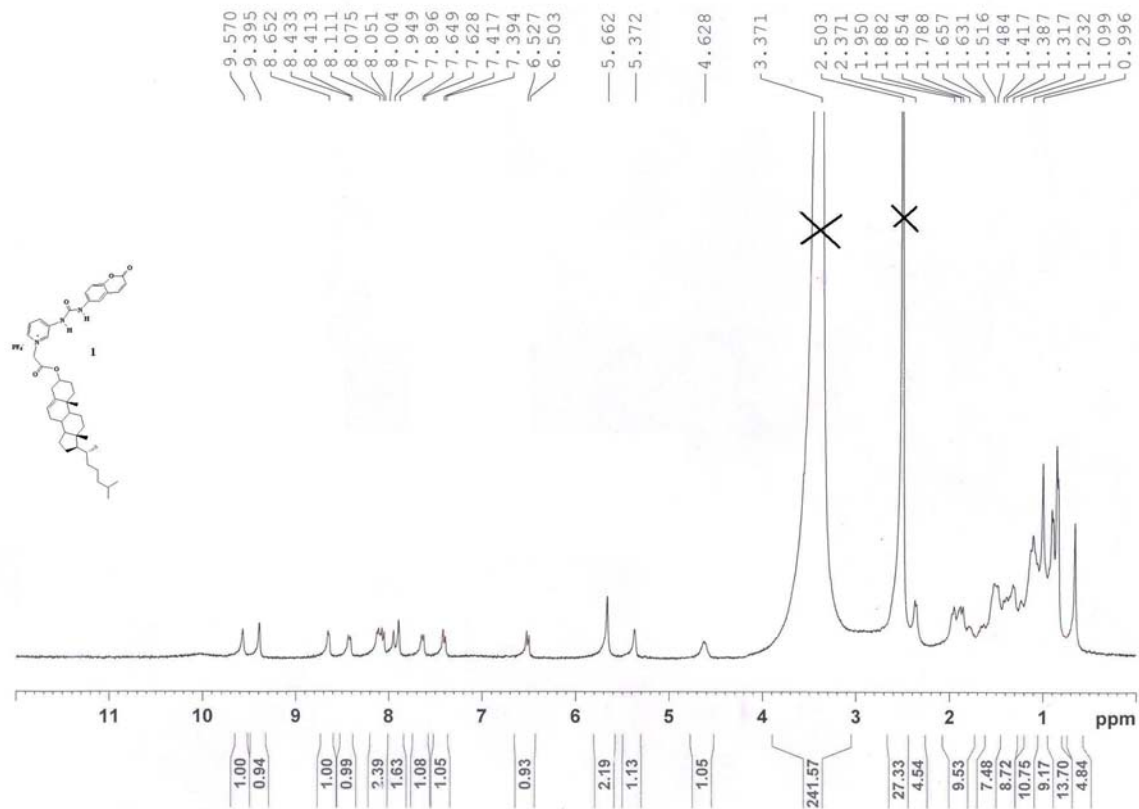



## Mass

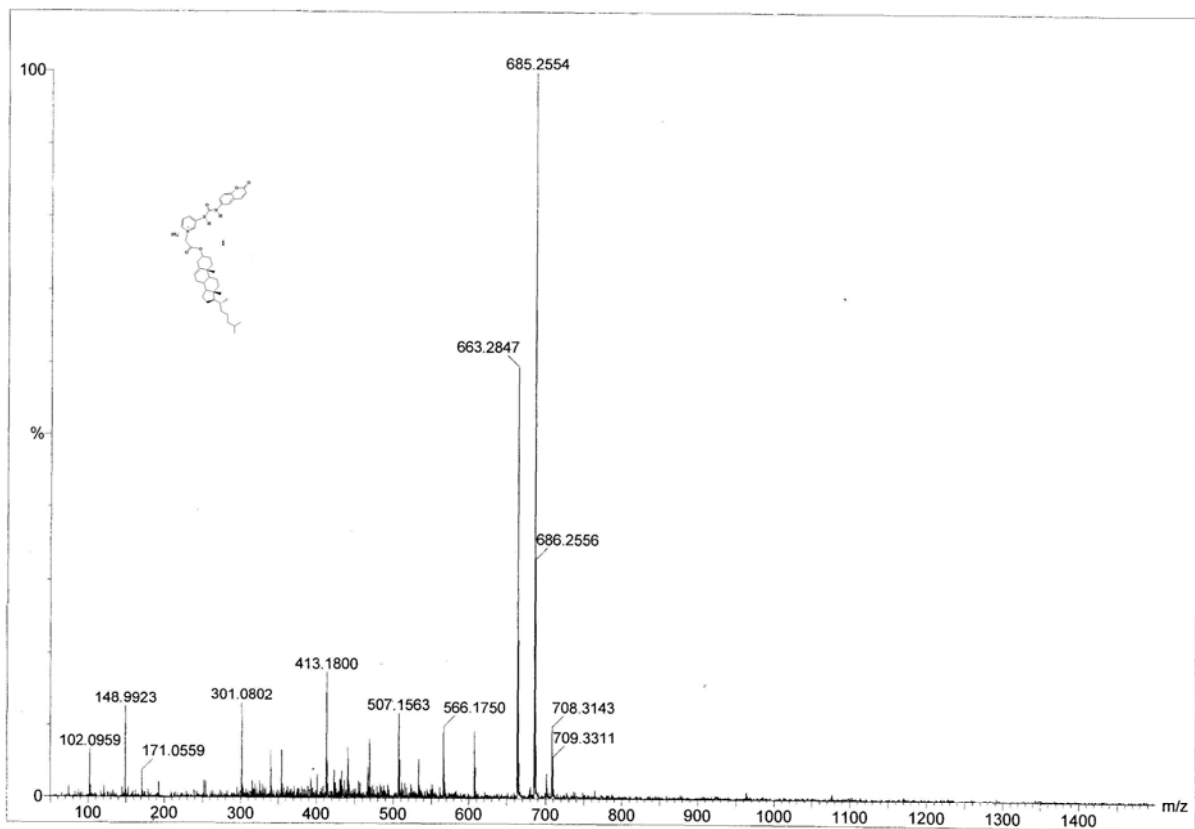

<sup>1</sup>H NMR (400 MHz, d<sub>6</sub>-DMSO)

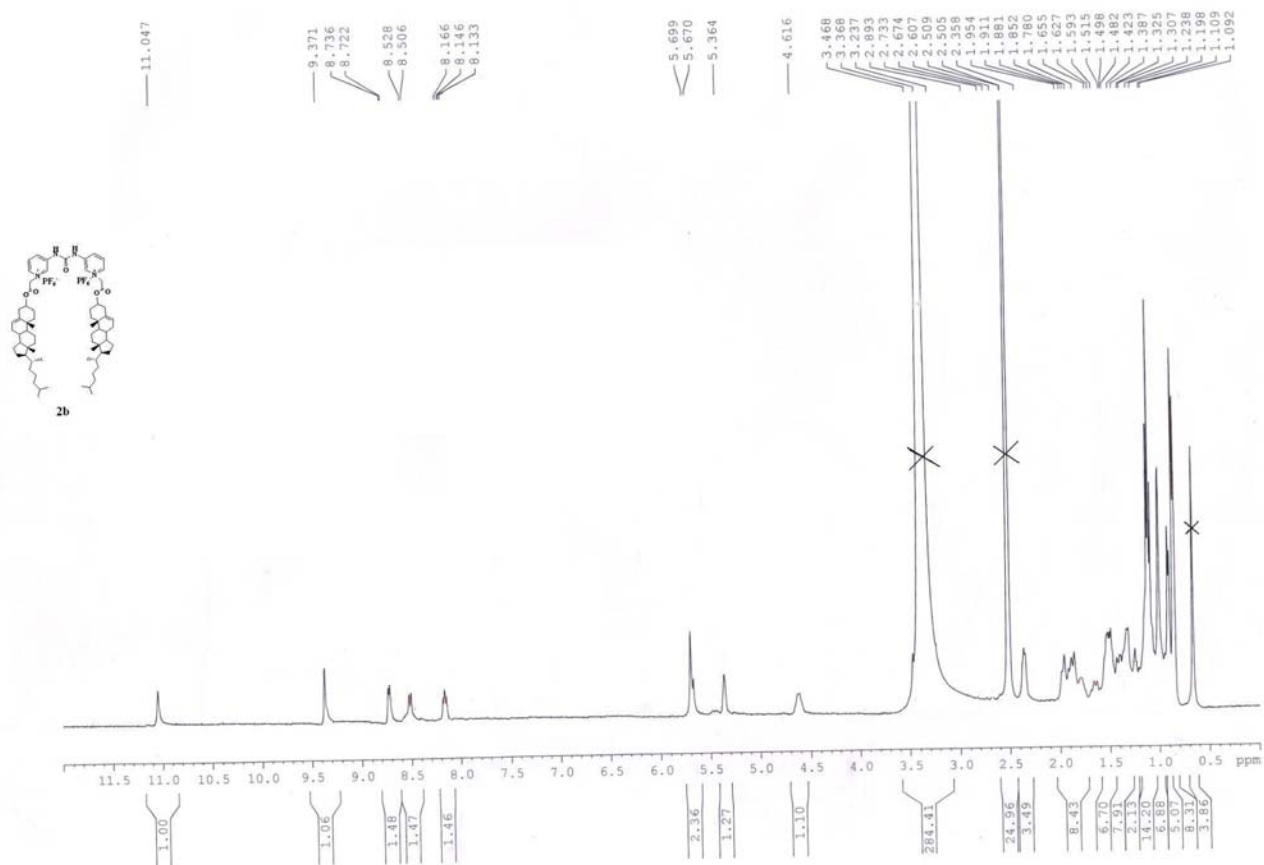

$^{13}\text{C}$  NMR (100 MHz,  $\text{d}_6\text{-DMSO}$ )

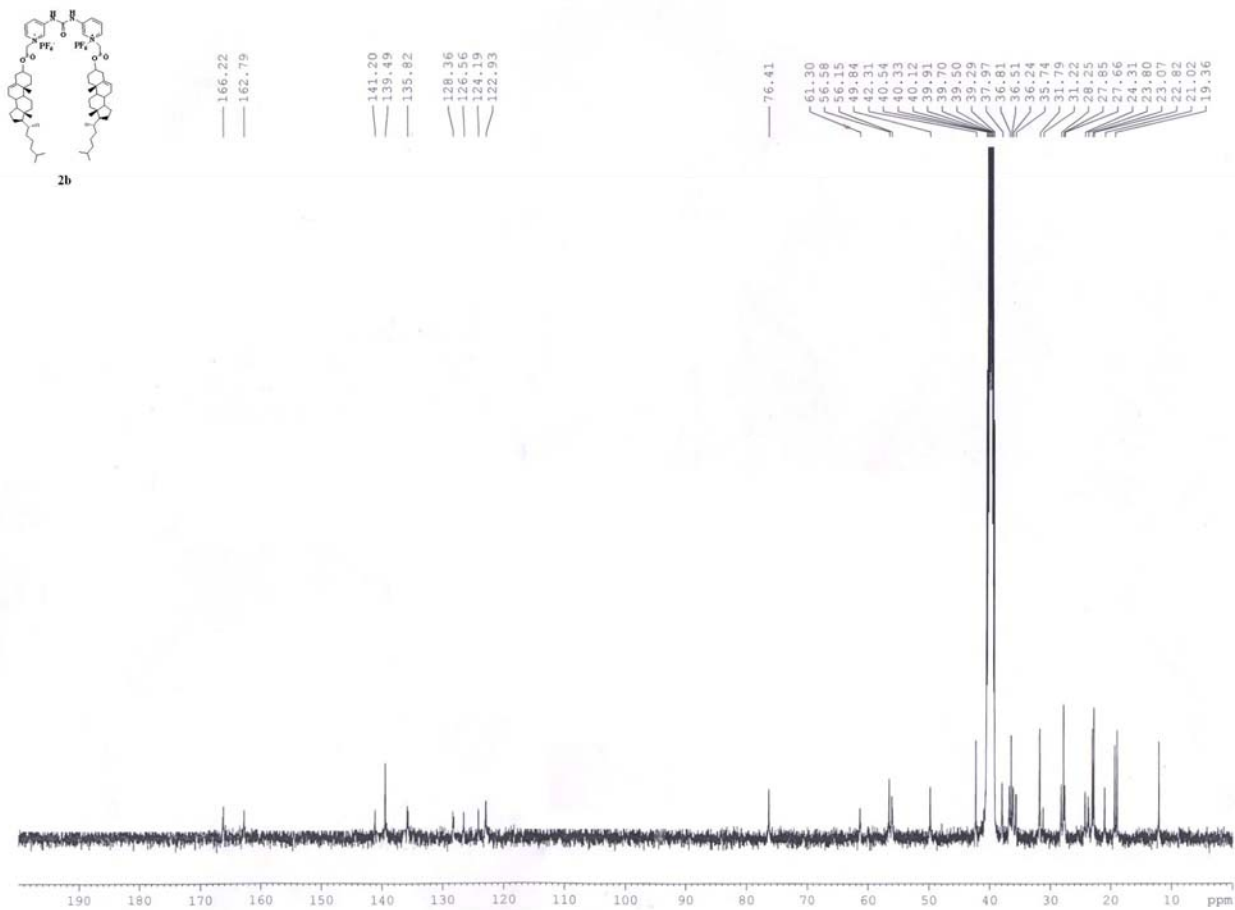

## Mass

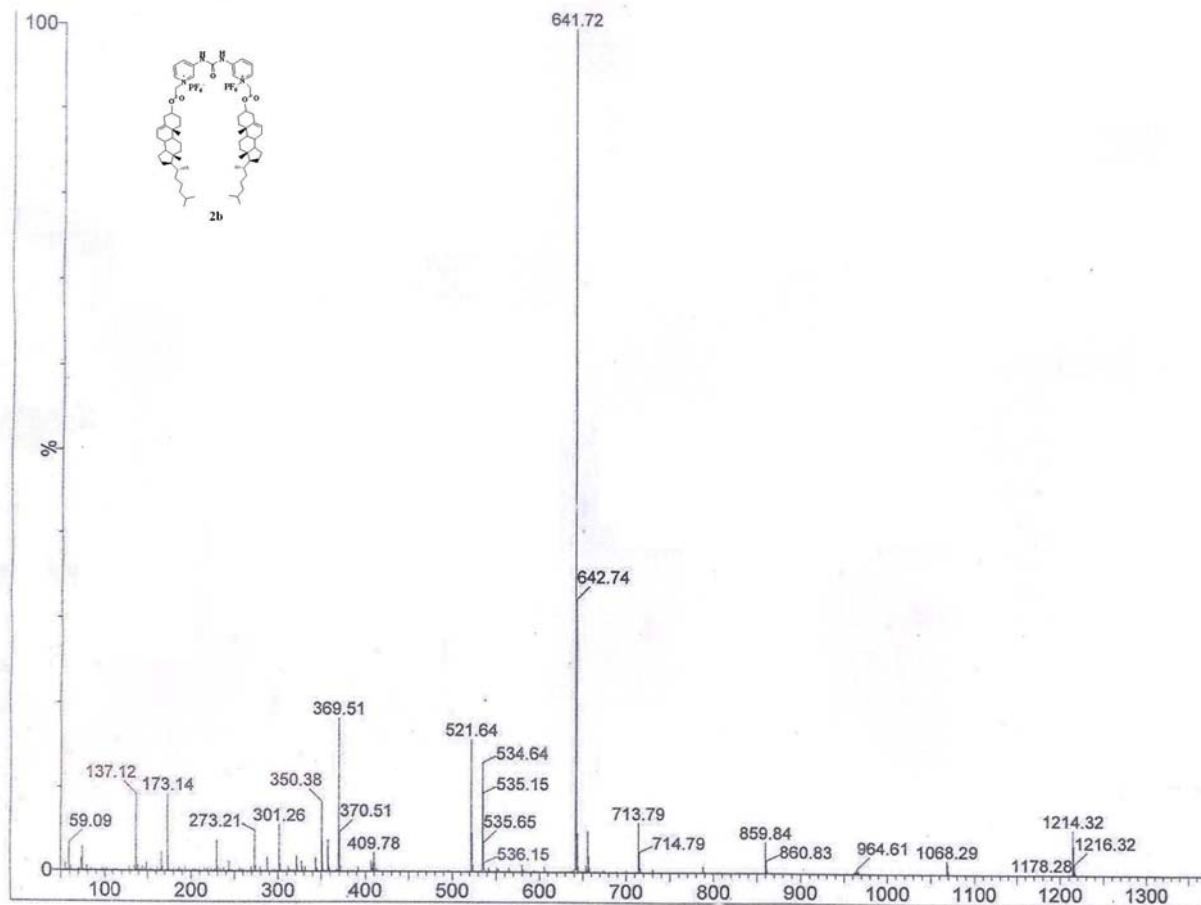

### 13. Comparative $^1\text{H}$ NMR and FTIR spectra

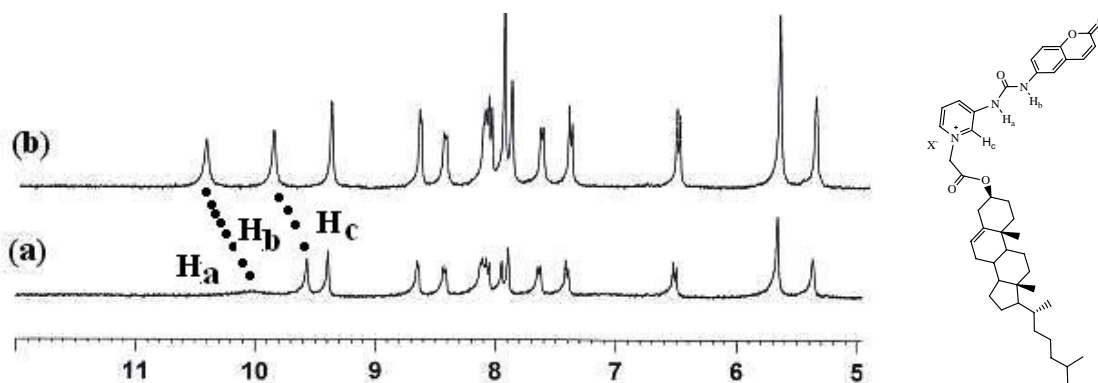

Fig 12S. Partial  $^1\text{H}$  NMR (400 MHz,  $\text{d}_6\text{DMSO}$ ) of (a) **1** ( $\text{X} = \text{PF}_6^-$ ,  $c = 4.8 \times 10^{-3} \text{ M}$ ) and (b)  $\text{X} = \text{Cl}^-$ .

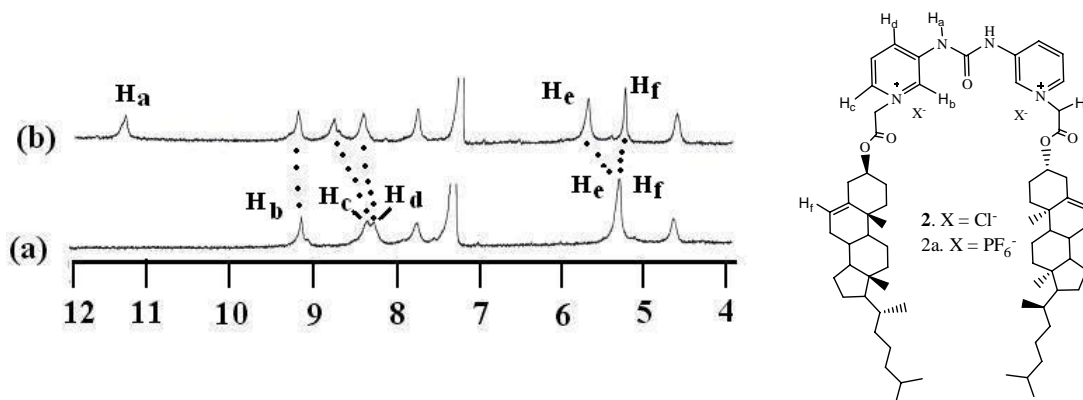

Fig 13S. Partial  $^1\text{H}$  NMR (400 MHz,  $\text{CDCl}_3$  containing 5%  $\text{d}_6\text{DMSO}$ ) of (a) **2a** and (b) **2**.

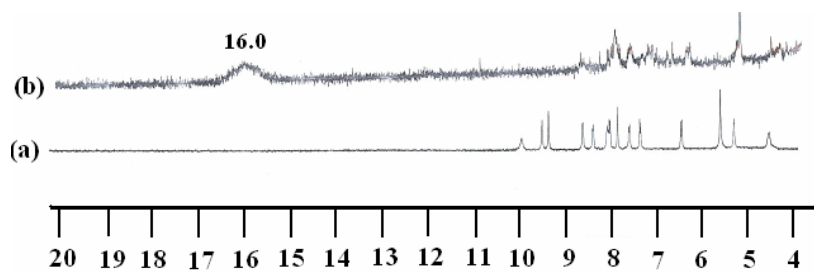

Fig 14S. Partial  $^1\text{H}$  NMR (400 MHz,  $\text{d}_6\text{DMSO}$ ) of (a) **1** and (b) after addition of 3 equivalent amounts of tetrabutylammonium fluoride.

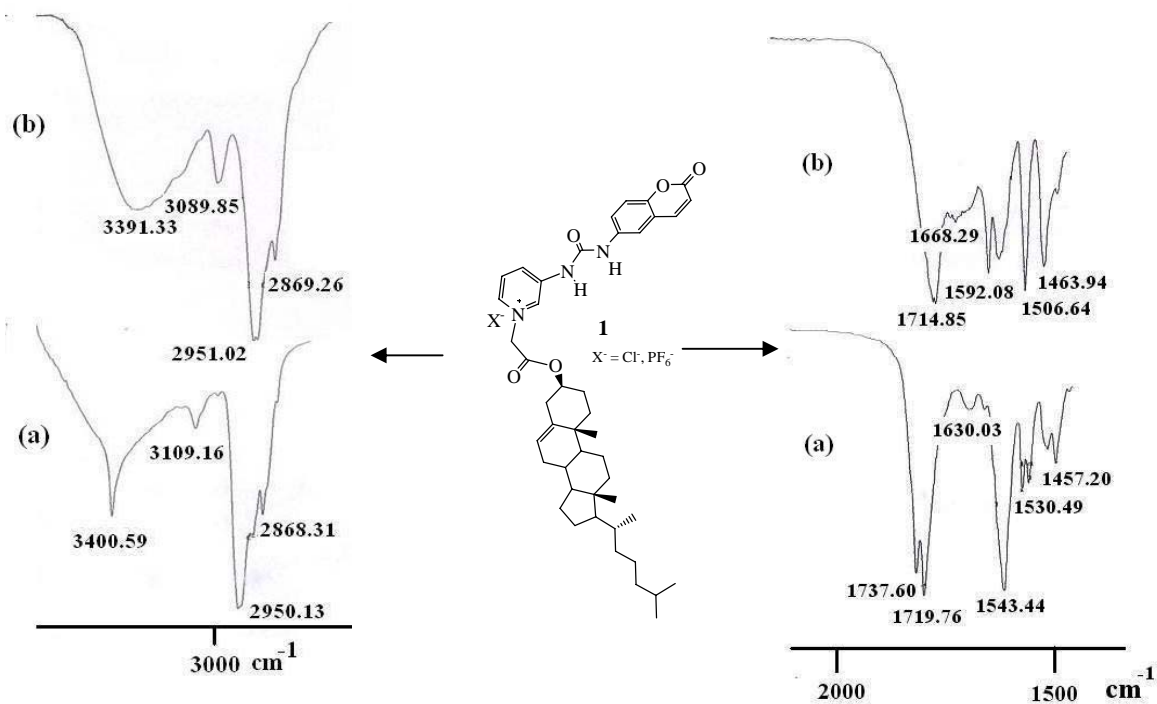

Fig 15S. Partial FT-IR (in KBr) of (a) **1** and (b) chloride salt of **1**.

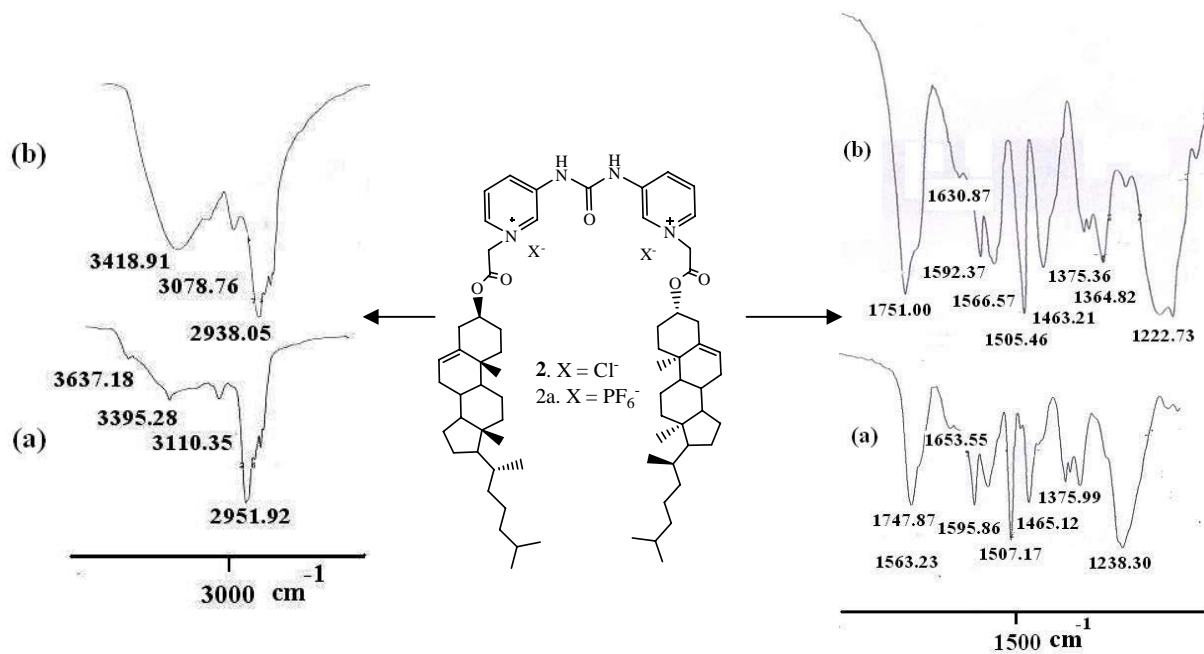

Fig 16S. Partial FT-IR (in KBr) of (a) **2a** and (b) **2**



## 14. UV-vis titration spectra for **2** with the anions.

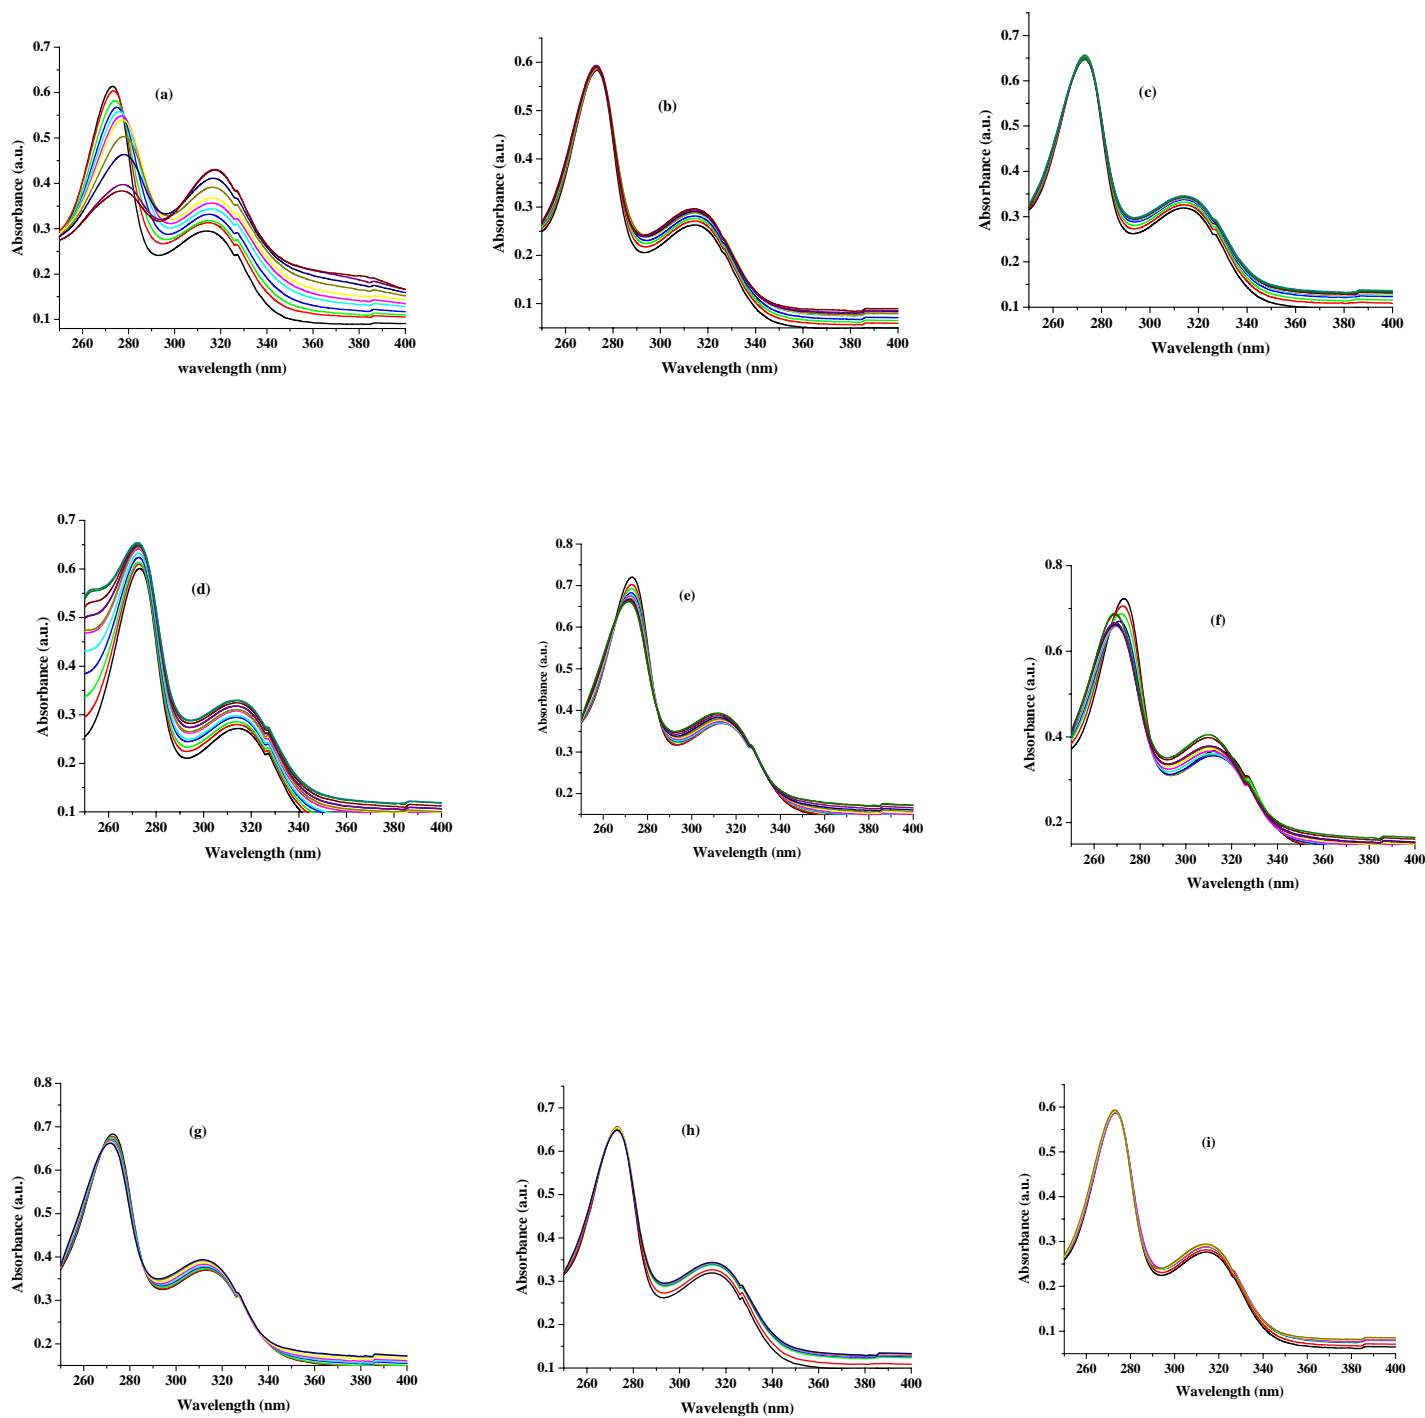

**Fig 17S.** Absorption titration spectra for **2** ( $c = 4.05 \times 10^{-5}$  M) with (a)  $F^-$ , (b)  $Cl^-$ , (c)  $Br^-$ , (d)  $I^-$ , (e)  $H_2PO_4^-$ , (f)  $HSO_4^-$ , (g)  $AcO^-$ , (h)  $NO_3^-$ , (i)  $ClO_4^-$  in  $CHCl_3$  (in all cases  $[anion] = 1 \times 10^{-3}$  M).
